# Supplementary material for: Predicting Non Return to Work after Orthopaedic Trauma: The Wallis Occupational Rehabilitation RisK (WORRK) Model
Source: PLoS One. 2014 Apr 9;9(4):e94268. doi: 10.1371/journal.pone.0094268 (PMC3981787; doi:10.1371/journal.pone.0094268)
Supplement: Reduced Model S1 — The WORRK Model and Probability Risk Score. (PDF) [file pone.0094268.s001.pdf]

## Reduced Model S1: The Wallis Occupational Rehabilitation Risk (WORRK) model and Probability Risk Score

| Patient's personal data                                                          |                                                                                                    |                                                                                                                                                          |                                                                                                                                                                     |                                                                                                                                                                                  |
|----------------------------------------------------------------------------------|----------------------------------------------------------------------------------------------------|----------------------------------------------------------------------------------------------------------------------------------------------------------|---------------------------------------------------------------------------------------------------------------------------------------------------------------------|----------------------------------------------------------------------------------------------------------------------------------------------------------------------------------|
| 1. Age : <input type="text"/> <input type="text"/> yrs                           |                                                                                                    | 2. Education $\geq$ 9 yrs : <input type="checkbox"/> Y / <input type="checkbox"/> N                                                                      |                                                                                                                                                                     | 3. Professional certification: <input type="checkbox"/> Y / <input type="checkbox"/> N                                                                                           |
| 4. Work related injury : <input type="checkbox"/> Y / <input type="checkbox"/> N |                                                                                                    |                                                                                                                                                          | 5. Local native language: <input type="checkbox"/> Y / <input type="checkbox"/> N                                                                                   |                                                                                                                                                                                  |
| Patient's perception data                                                        |                                                                                                    |                                                                                                                                                          |                                                                                                                                                                     |                                                                                                                                                                                  |
| 6. Pain                                                                          | no pain _____ the worst pain                                                                       |                                                                                                                                                          |                                                                                                                                                                     |                                                                                                                                                                                  |
| 7. Quality of Life                                                               | the best _____ the worst<br>it has _____ it has<br>ever been _____ ever been                       |                                                                                                                                                          |                                                                                                                                                                     |                                                                                                                                                                                  |
| Patient's biopsychosocial data                                                   |                                                                                                    |                                                                                                                                                          |                                                                                                                                                                     |                                                                                                                                                                                  |
|                                                                                  | <input type="checkbox"/> 0                                                                         | <input type="checkbox"/> 1                                                                                                                               | <input type="checkbox"/> 2                                                                                                                                          | <input type="checkbox"/> 3                                                                                                                                                       |
| 8. Chronicity                                                                    | Less than 3 months of physical dysfunctionning                                                     | More than 3 months of physical dysfunctionning or several period of less than 3 months                                                                   | A chronic disease                                                                                                                                                   | Several chronic disease                                                                                                                                                          |
|                                                                                  | <input type="checkbox"/> 0                                                                         | <input type="checkbox"/> 1                                                                                                                               | <input type="checkbox"/> 2                                                                                                                                          | <input type="checkbox"/> 3                                                                                                                                                       |
| 9. Restrictions in coping                                                        | No restrictions in coping; ability to manage stress adequately, no impairment of medical treatment | Mild restrictions in coping which causes mild to moderate distress in patients and/or relatives or health care providers (such as complaining behaviour) | Moderate restrictions in coping which causes severe emotional distress in patients and/or relatives or health care providers and/or impairment of medical treatment | Severe limitations in coping which produces serious psychiatric symptomatology such as substance abuse, self-mutilation or attempted suicide and impairment of medical treatment |
|                                                                                  | <input type="checkbox"/> 0                                                                         | <input type="checkbox"/> 1                                                                                                                               | <input type="checkbox"/> 2                                                                                                                                          | <input type="checkbox"/> 3                                                                                                                                                       |
| 10. Resistance to treatment                                                      | Interested in receiving treatment and willing to cooperate with treatment                          | Some ambivalence though willing to cooperate to treatment                                                                                                | Considerable resistance, such as non-compliance, hostility or indifference toward health care professionals                                                         | Active resistance against medical care                                                                                                                                           |
|                                                                                  | <input type="checkbox"/> 0                                                                         | <input type="checkbox"/> 1                                                                                                                               | <input type="checkbox"/> 2                                                                                                                                          | <input type="checkbox"/> 3                                                                                                                                                       |
| 11. Psychiatric symptoms                                                         | No psychiatric symptoms                                                                            | Mild psychiatric symptoms such as problem to concentrate or feeling tense                                                                                | Psychiatric symptoms such as anxiety, depression or confusion                                                                                                       | Psychiatric symptoms with behavioural disturbances, such as violence or self-inflicting behaviour                                                                                |
|                                                                                  | <input type="checkbox"/> 0                                                                         | <input type="checkbox"/> 1                                                                                                                               | <input type="checkbox"/> 2                                                                                                                                          | <input type="checkbox"/> 3                                                                                                                                                       |
| 12. Restrictions in integration                                                  | A job (including housekeeping, retirement, studying) and having leisure activities                 | A job (including housekeeping, retirement, studying) without leisure activities                                                                          | Unemployed now and for at least 6 month with leisure activities                                                                                                     | Unemployed now and for at least 6 month without leisure activities                                                                                                               |
|                                                                                  | <input type="checkbox"/> 0                                                                         | <input type="checkbox"/> 1                                                                                                                               | <input type="checkbox"/> 2                                                                                                                                          | <input type="checkbox"/> 3                                                                                                                                                       |
| 13. Social dysfunctionning                                                       | No social disruption                                                                               | Mild social dysfunction, interpersonal problems                                                                                                          | Moderate social dysfunction, such as inability to initiate or maintain social relations                                                                             | Severe social dysfunction, such as involvement in disruptive social relations or social isolation                                                                                |
|                                                                                  | <input type="checkbox"/> 0                                                                         | <input type="checkbox"/> 1                                                                                                                               | <input type="checkbox"/> 2                                                                                                                                          | <input type="checkbox"/> 3                                                                                                                                                       |
| 14. Restriction of network                                                       | Good contacts with family, work and friends                                                        | Restriction in one of the domains                                                                                                                        | Restrictions in two of the domains                                                                                                                                  | Restrictions in three of the domains                                                                                                                                             |

|                                 | □ 0                                                                                 | □ 1                                                                                                                                                              | □ 2                                                                                                                                             | □ 3                                                                                                                                                  |
|---------------------------------|-------------------------------------------------------------------------------------|------------------------------------------------------------------------------------------------------------------------------------------------------------------|-------------------------------------------------------------------------------------------------------------------------------------------------|------------------------------------------------------------------------------------------------------------------------------------------------------|
| 15. Organisation of care        | Primary care/general practitioner only                                              | Different specialists from the general health care system                                                                                                        | Both general health care and mental health care service                                                                                         | Hospitalization or transfer from a hospital                                                                                                          |
| 16. Complications & Life Threat | No risk of limitations in activities of daily living                                | Mild risk of limitations in activities of daily living                                                                                                           | Moderate risk of permanent limitations of activities in daily living                                                                            | Severe risk of physical complications with serious permanent functional deficits and/or dying                                                        |
| 17. Mental health threat        | No risk of psychiatric disorder                                                     | Mild risk of psychiatric symptoms, such as stress, anxiety, feeling blue, substance abuse or cognitive disorder; mild risk of treatment resistance (ambivalence) | Moderate risk of psychiatric disorder requiring psychiatric care; moderate risk of treatment resistance                                         | Severe risk of psychiatric disorder requiring frequent visits and/or hospital admissions; risk of refusal treatment for serious psychiatric disorder |
| 18. Social Vulnerability        | No risk of changes in the living situation; adequate social support and integration | No risk of changes in the living situation but additional social support and/or job accommodation                                                                | Risk of changes in the living situation, such as temporary admission to facility/institution and/or vocational guidance                         | Risk of need for permanent admission to facility/institution and/or permanent disability pension                                                     |
| 19. Coordination of health care | No problems in the organization of care                                             | Mild efforts needed to organize care: multidisciplinary care which is quite easy to organize, e.g. distant service access                                        | Moderate efforts to organize care: multidisciplinary care which is difficult to organize, e.g. potential insurance loss, communication barriers | Severe efforts needed to organize care, e.g. little or no insurance, resistance to communication and coordination among providers                    |

The probability not returning to work can be calculated with the formula:

$$\text{Probability Risk Score} = 1/[1 + \exp(- \text{scoring function})]$$

where the scoring function equals to  $-2.649848 + 0.0179208 * \text{Age, per one year} + \text{Education} > 9 \text{ yrs} * -0.2112931 + \text{Work related injury} * 0.1079563 + \text{Local native language} * -0.0857251 + \text{Qualified work} * -0.4087628 + \text{Pain} * 0.0069819 + \text{Quality of Life} * -0.006264 + \text{Chronicity} * -0.0287237 + \text{Restrictions in coping} * 0.0522402 + \text{Resistance to treatment} * 0.1753309 + \text{Psychiatric symptoms} * -0.0406474 + \text{Restrictions in integration} * 0.3793558 + \text{Social dysfunctionning} * 0.0095086 + \text{Restriction of network} * 0.3085014 + \text{Organisation of care} * 0.2552069 + \text{Complications \& Life Threat} * 0.4628969 + \text{Mental health threat} * -0.0729892 + \text{Social Vulnerability} * 0.0729917 + \text{Coordination of health care} * 0.1123762$

The coefficients are based on both samples with 1423 (development sample) + 819 (validation sample) patients.
